# Supplementary material for: “They’re going too far”: Actively distancing from climate radicals improves public support for moderate climate activists
Source: Research Square preprint supplement (doi:10.21203/rs.3.rs-6812512/v1), 2025-06-25
Supplement: Supplementary file 1 [file be70777ab83a28729702b1f9.docx]

| Author | Conceptualization | Pre-Registration | Methods | Validation | Formal Analysis | Investigation | Data Curation | Writing – Original Draft | Writing – Reviewing and Editing | Visualization | Supervision | Project Administration | Funding Acquisition |
| --- | --- | --- | --- | --- | --- | --- | --- | --- | --- | --- | --- | --- | --- |
| JKK | x | x | x |  | x | x | x | x | x | x |  | x | x |
| LF | x | x | x | x |  |  |  |  | x |  |  |  |  |
| SRN | x |  | x |  |  |  |  |  | x |  | x |  | x |
| MPW | x | x | x |  |  |  |  |  | x |  | x |  |  |
| SP | x | x | x |  |  |  |  |  | x |  | x |  | x |
